# Supplementary material for: Boosting of Cross-Reactive Antibodies to Endemic Coronaviruses by SARS-CoV-2 Infection but not Vaccination with Stabilized Spike
Source: bioRxiv or medRxiv preprint supplement (doi:10.1101/2021.10.27.21265574), 2021-10-28
Supplement: Supplementary file [file media-1.pdf]

## Supplementary Materials

| <b>Supplementary Figures</b> |                                                                                                                        |
|------------------------------|------------------------------------------------------------------------------------------------------------------------|
| Supplementary Figure 1       | Structural differences between the S1 domain of SARS-CoV-2 and endemic strains.                                        |
| Supplementary Figure 2       | IgA and IgM responses in the DHMC cohort.                                                                              |
| Supplementary Figure 3       | Antibody responses in the JHMI cohort.                                                                                 |
| Supplementary Figure 4       | Elevated IgG but not IgM responses to endemic CoV in convalescent cohorts.                                             |
| Supplementary Figure 5       | Elevated responses to endemic CoV in the pre- and post-infection cohort.                                               |
| Supplementary Figure 6       | Correlative relationships between SARS-CoV-2- and OC43-specific antibody responses in the JHMI cohort by isotype.      |
| Supplementary Figure 7       | Cross-reactivity of SARS-CoV-2 S-2P specific IgG.                                                                      |
| Supplementary Figure 8       | Cross-reactivity of SARS-CoV-2 RBD specific IgG.                                                                       |
| Supplementary Figure 9       | Cross-reactivity of SARS-CoV-2 S2 specific IgG.                                                                        |
| Supplementary Figure 10      | Cross-reactivity of OC43 S specific IgG.                                                                               |
| Supplementary Figure 11      | Cross-reactivity of SARS-CoV-2 S-2P specific IgA.                                                                      |
| Supplementary Figure 12      | Cross-reactivity of SARS-CoV-2 RBD specific IgA.                                                                       |
| Supplementary Figure 13      | Cross-reactivity of SARS-CoV-2 S2 specific IgA.                                                                        |
| Supplementary Figure 14      | Cross-reactivity of OC43 S specific IgA.                                                                               |
| Supplementary Figure 15      | Cross-reactivity of SARS-CoV-2 S-2P specific IgM.                                                                      |
| Supplementary Figure 16      | Cross-reactivity of SARS-CoV-2 RBD specific IgM.                                                                       |
| Supplementary Figure 17      | Cross-reactivity of SARS-CoV-2 S2 specific IgM.                                                                        |
| Supplementary Figure 18      | Cross-reactivity of OC43 S specific IgM.                                                                               |
| Supplementary Figure 19      | IgA and IgM responses among naïve subjects, infected pregnant women, vaccinated adults, and vaccinated pregnant women. |
| <b>Supplementary Tables</b>  |                                                                                                                        |
| Supplementary Table 1        | Coronavirus structures.                                                                                                |
| Supplementary Table 2        | Fc detection and antigen reagents.                                                                                     |

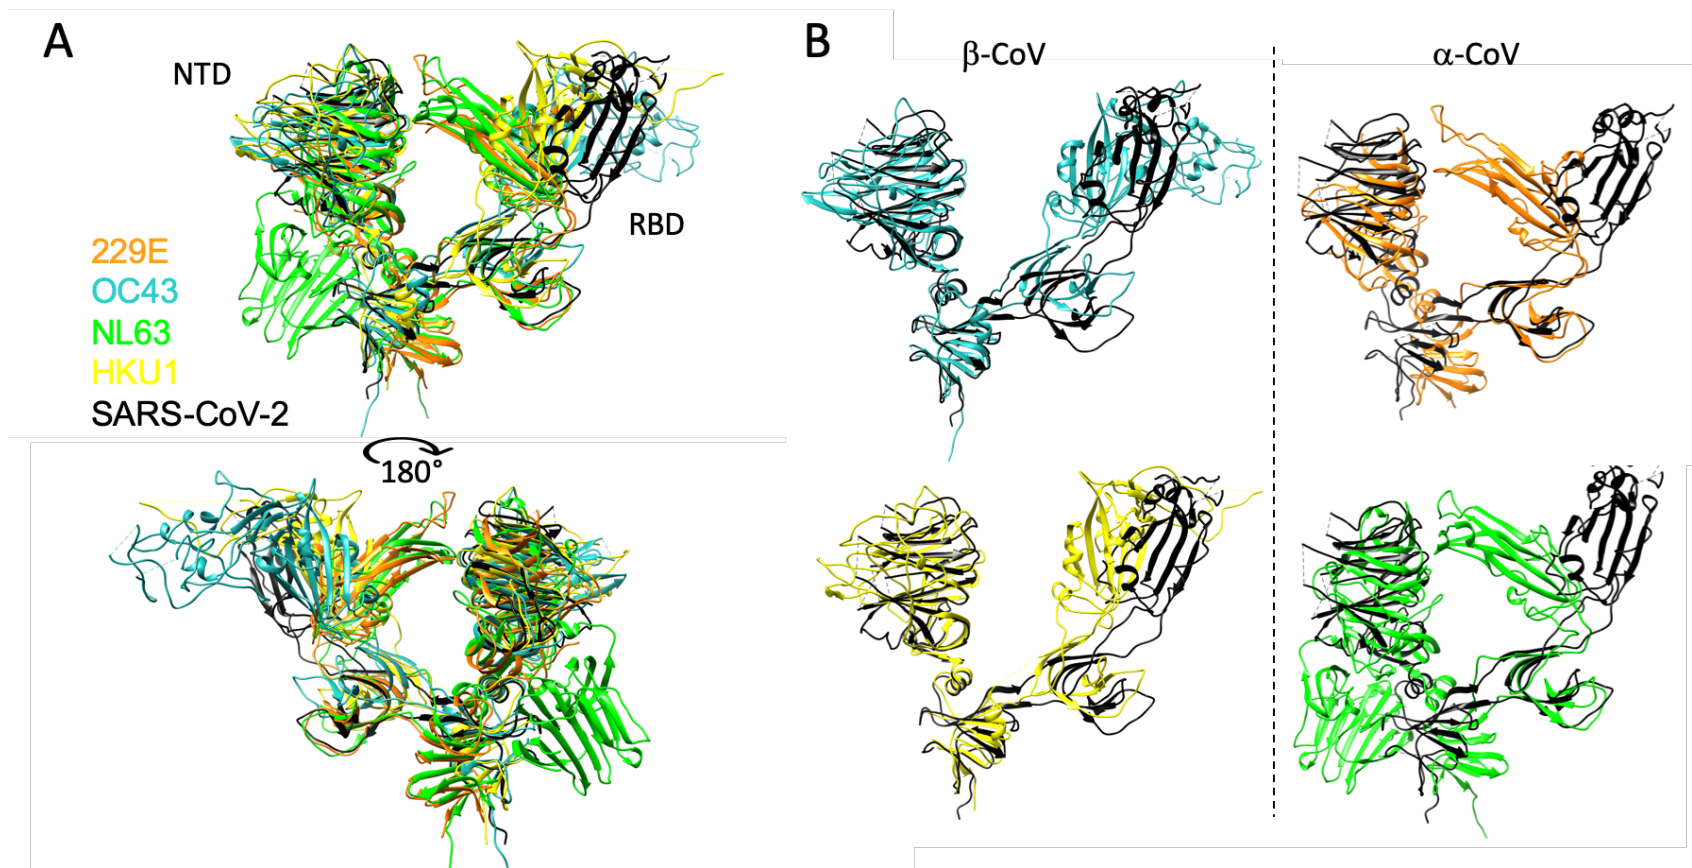

**Supplemental Figure 1. Structural differences between the S1 domain of SARS-CoV-2 and endemic strains. A.** Structural models of the NTD and RBD as ribbons, colored by strain: SARS-CoV-2 (black), 229E (orange), OC43 (blue), NL63 (green), and HKU1 (yellow). Structural alignments were restricted to the residues of the S1 domain. Right-alignments between SARS-CoV2 and the endemic S1 domains shown individually rather than overlaid, with  $\beta$ -CoV at left, and  $\alpha$ -CoV at right.

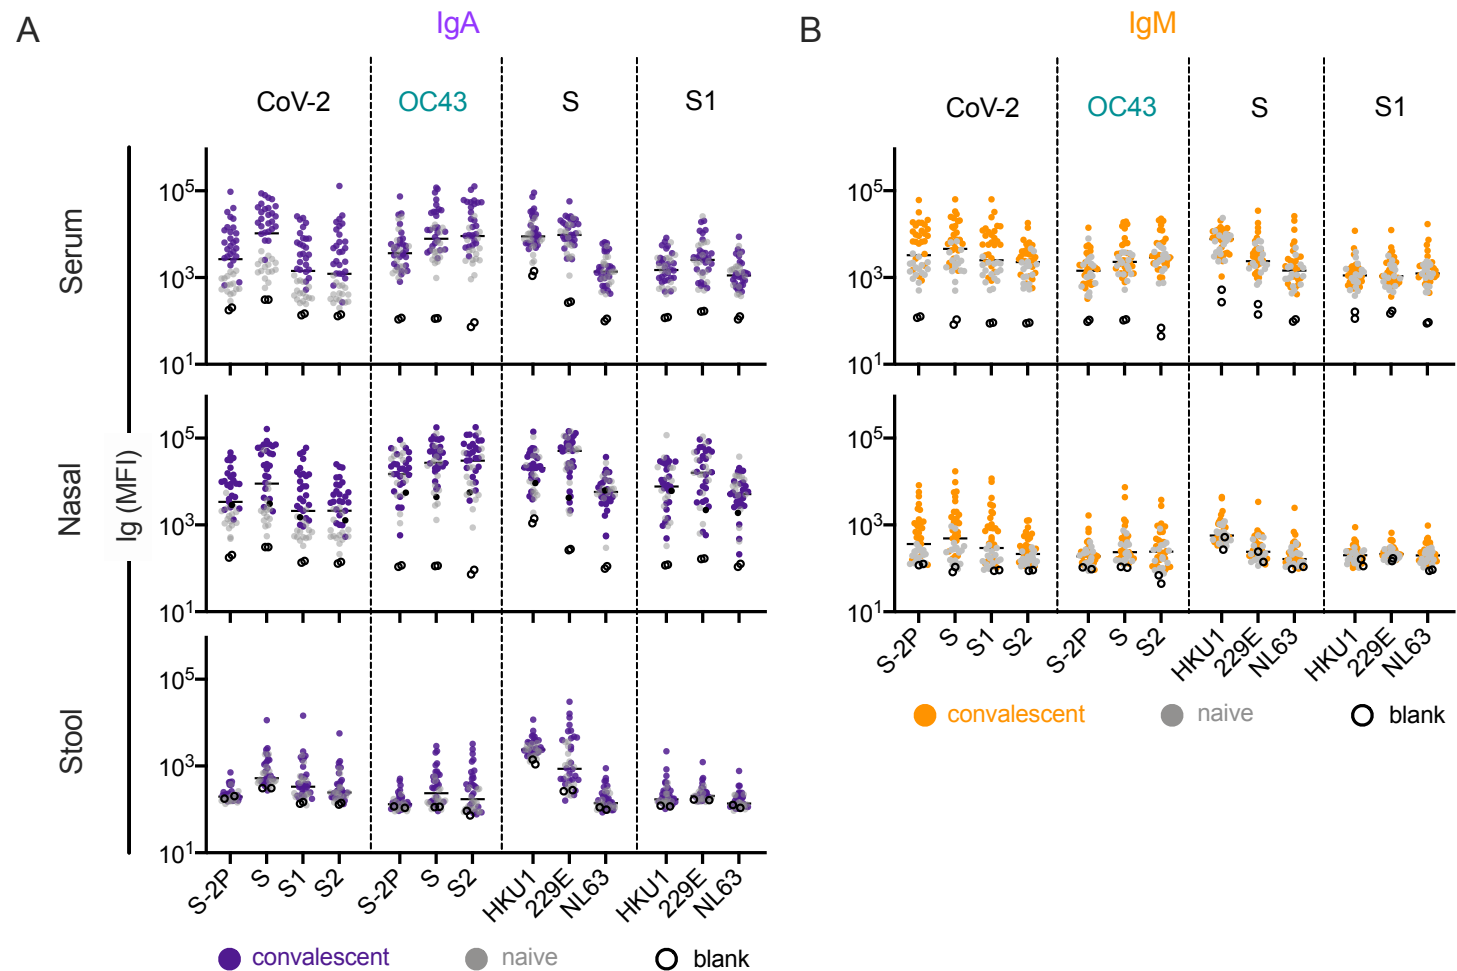

**Supplemental Figure 2. IgA and IgM responses in the DHMC cohort. A-B.** IgA (A) and IgM (B) responses in serum (top), nasal wash (middle) and stool (bottom) across antigens from CoV-2, OC43, and other endemic CoV S, and S1 proteins. Samples from naïve subjects are indicated in gray, SARS-CoV-2 convalescents at one month post infection in color, and buffer blanks in hollow circles.

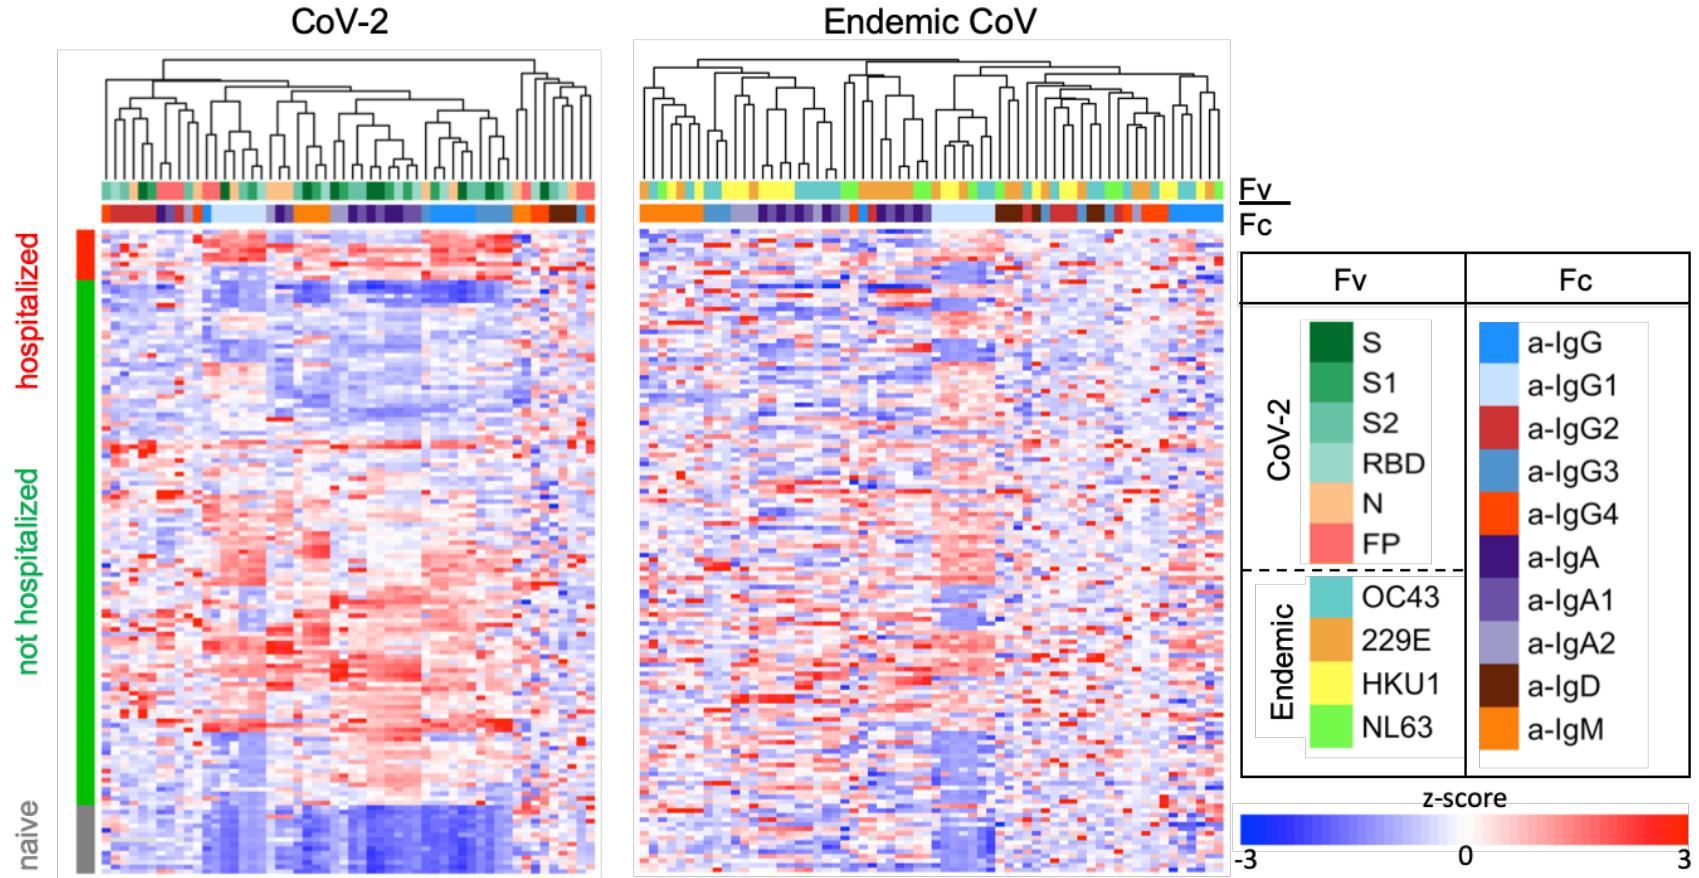

**Supplemental Figure 3. Antibody responses in the JHMI cohort.** Heatmap of filtered and hierarchically clustered features and within subject groups according to infection and hospitalization status. Ab responses to SARS CoV-2 features are shown on the left and those specific to endemic CoV on the right. Responses were scaled and centered within features and the scale was truncated at +/- 3 SD. Antigen specificity (Fv) and Fc characteristics (Fc) are indicated in the color bars.

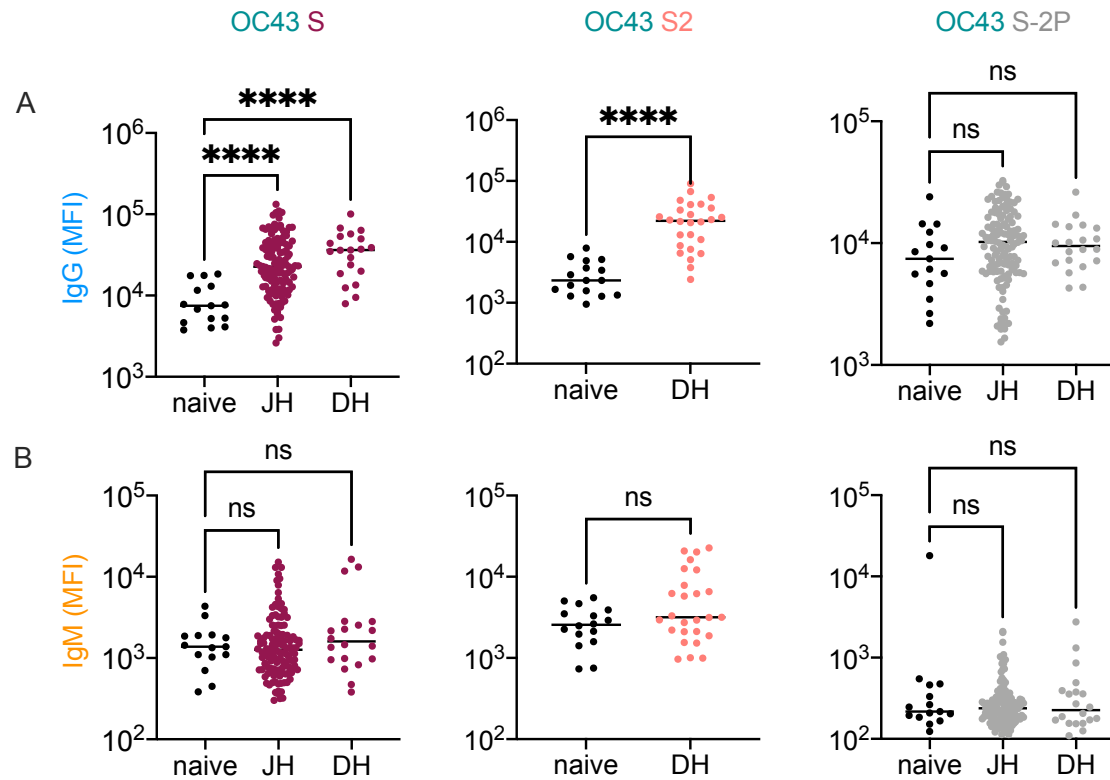

**Supplemental Figure 4. Elevated IgG but not IgM responses to endemic CoV in convalescent cohorts. A-B.** Comparison between IgG (A) and IgM (B) levels in naïve, DHMC (DH), and JHMI (JH) cohort samples to OC43 S, OC43 S2, and OC43 S-2P. Significant differences were defined by ANOVA with Dunnett's correction (\*\*\*\* $p < 0.0001$ ).

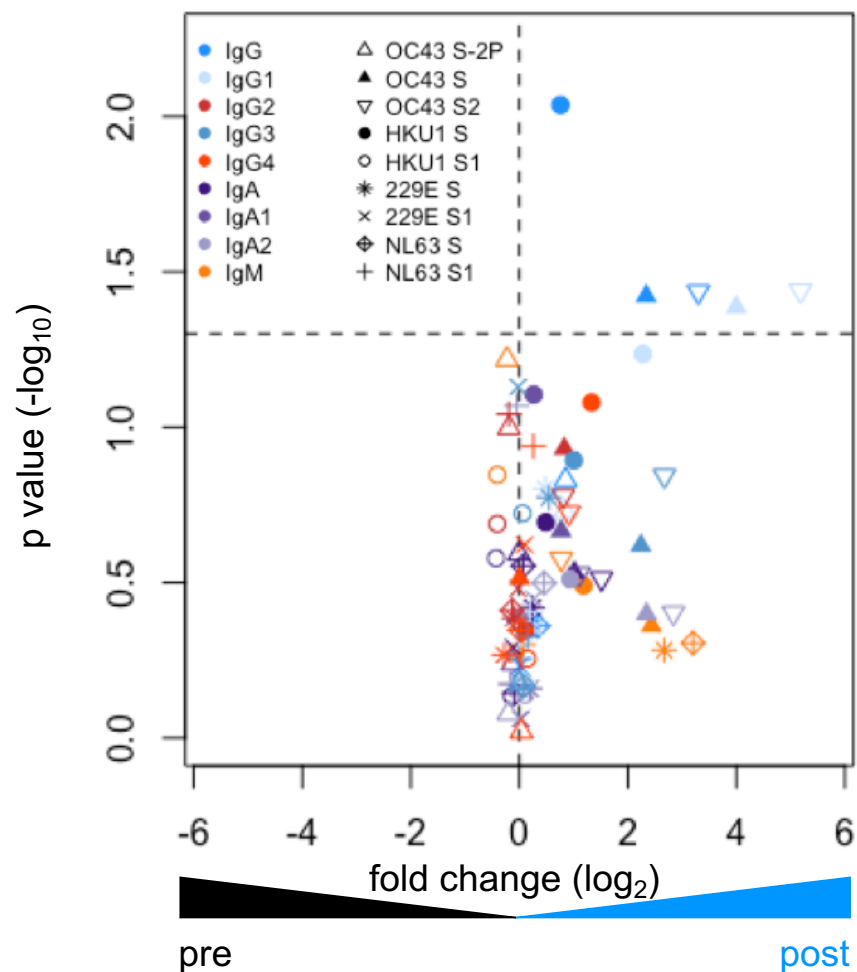

**Supplemental Figure 5. Elevated responses to endemic CoV in the pre- and post-infection cohort.** Volcano plot of fold change and significance (paired t test) of differences between antibody responses observed in convalescent subjects in the pre- and post-infection cohort. Dotted horizontal line indicates unadjusted  $p = 0.05$ . Each symbol represents an antibody response feature, with Fc domain characteristics represented by color and Fv antigen-specificity indicated by shape.

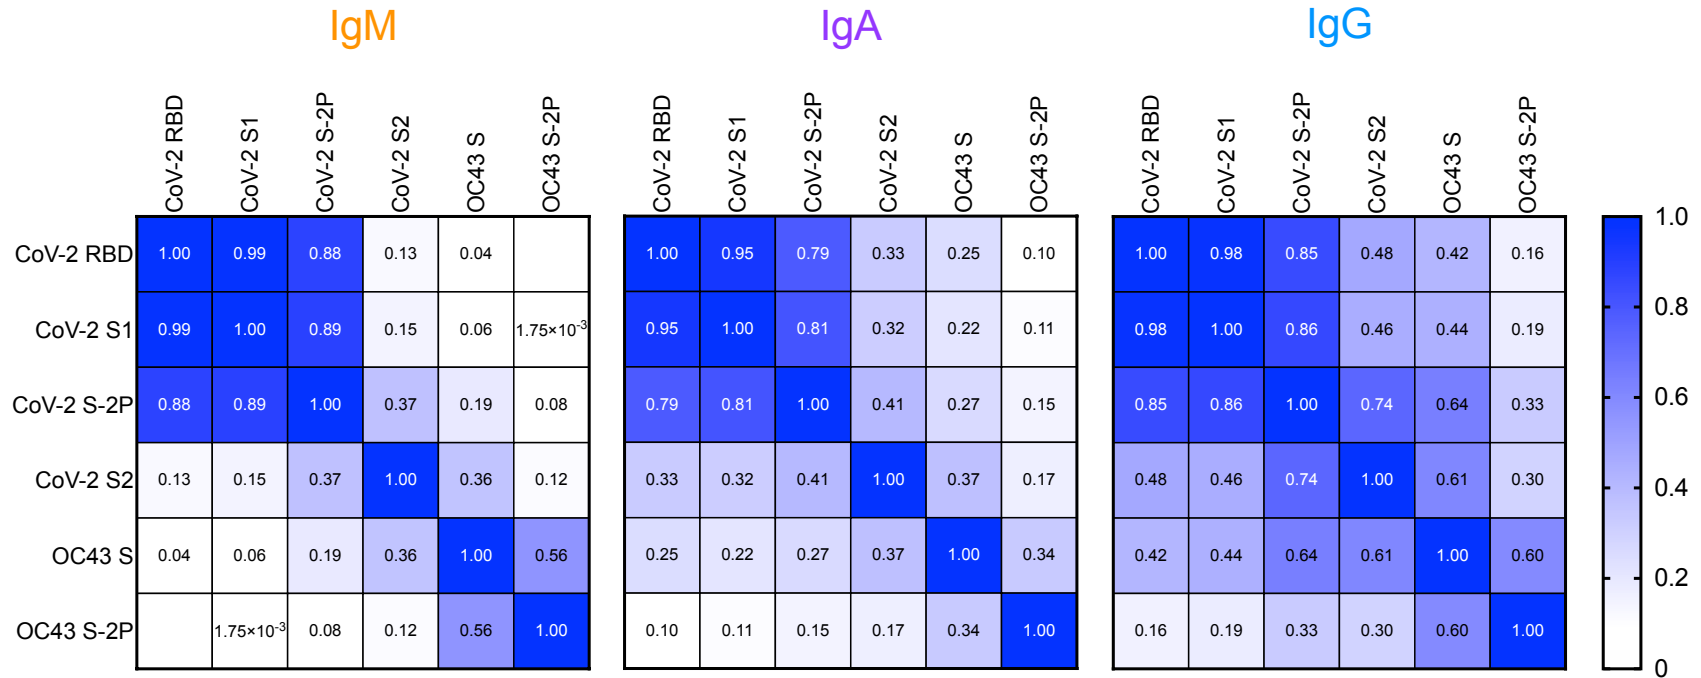

**Supplemental Figure 6. Correlative relationships between SARS-CoV-2- and OC43-specific antibody responses in the JHMI cohort by isotype.** Heatmap of Pearson correlation coefficients observed among SARS-CoV-2- and OC43-specific IgM (left), IgA (center), and IgG (right) isotypes.

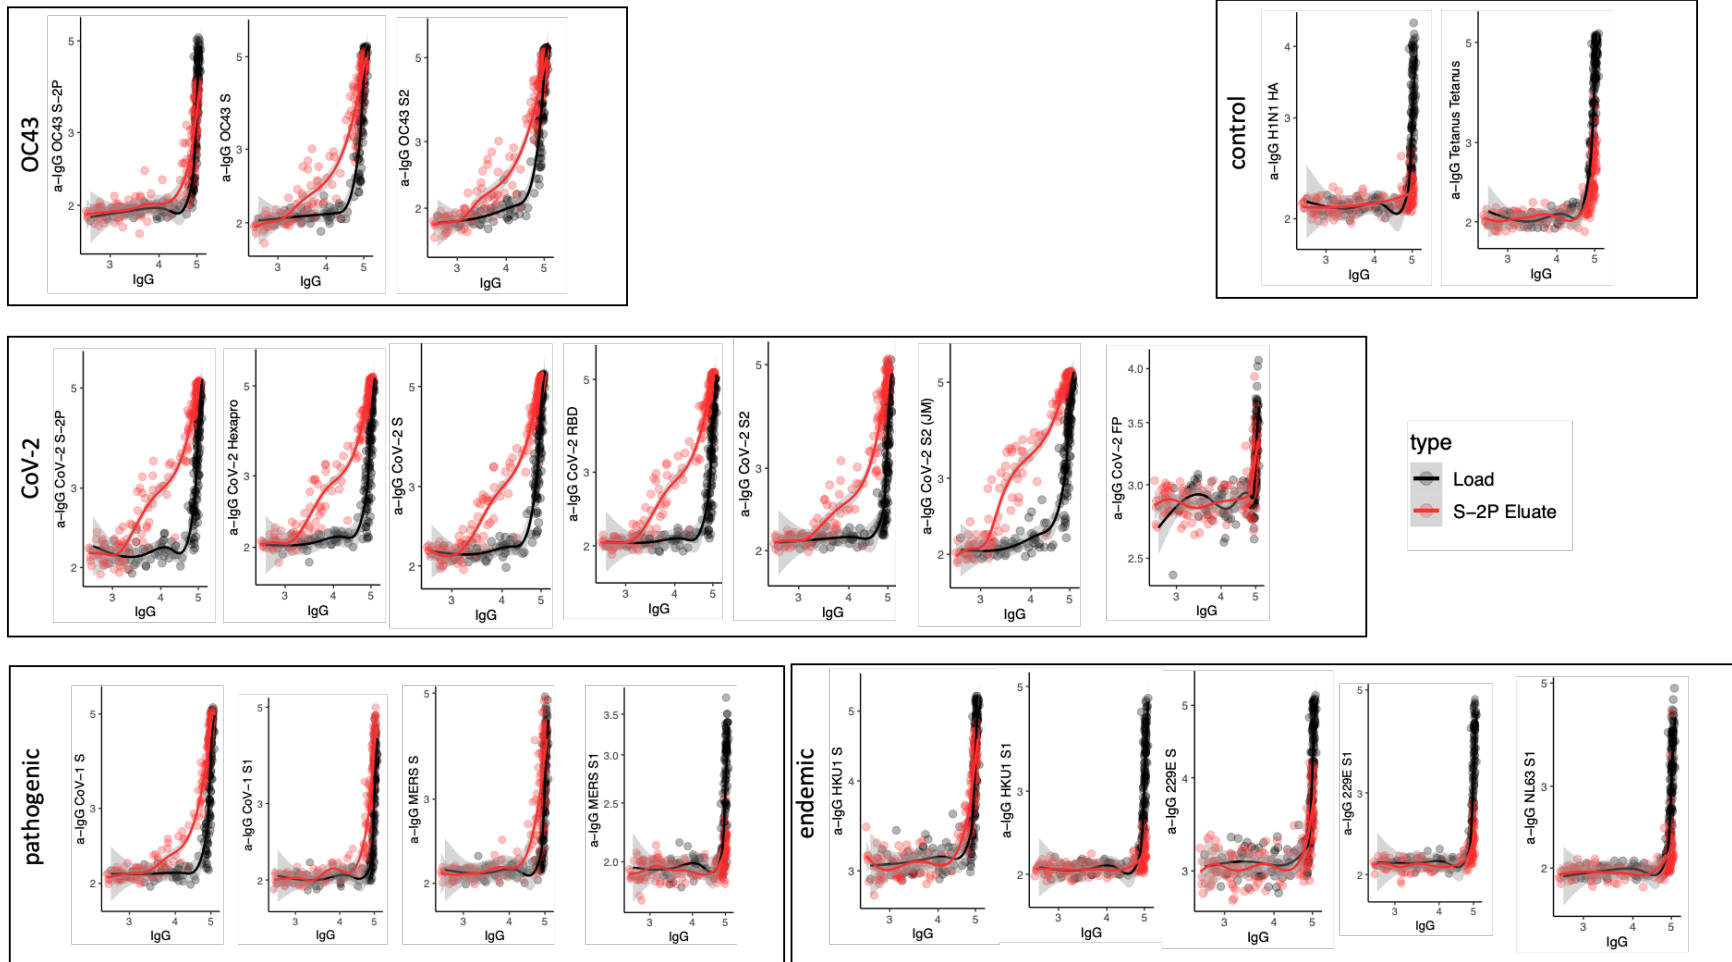

**Supplemental Figure 7: Cross-reactivity of SARS-CoV-2 S-2P specific IgG.** Antigen binding profiles of IgG in unfractionated serum (load, black) and affinity-purified CoV-2 S-2P- (eluate, red) fractions from 30 SARS-CoV-2 convalescent subjects across OC43, control, CoV-2, pathogenic CoV, and other endemic CoV. Y-axis depicts binding signal for indicated antigen specificity, x-axis depicts signal from total IgG quantitation.



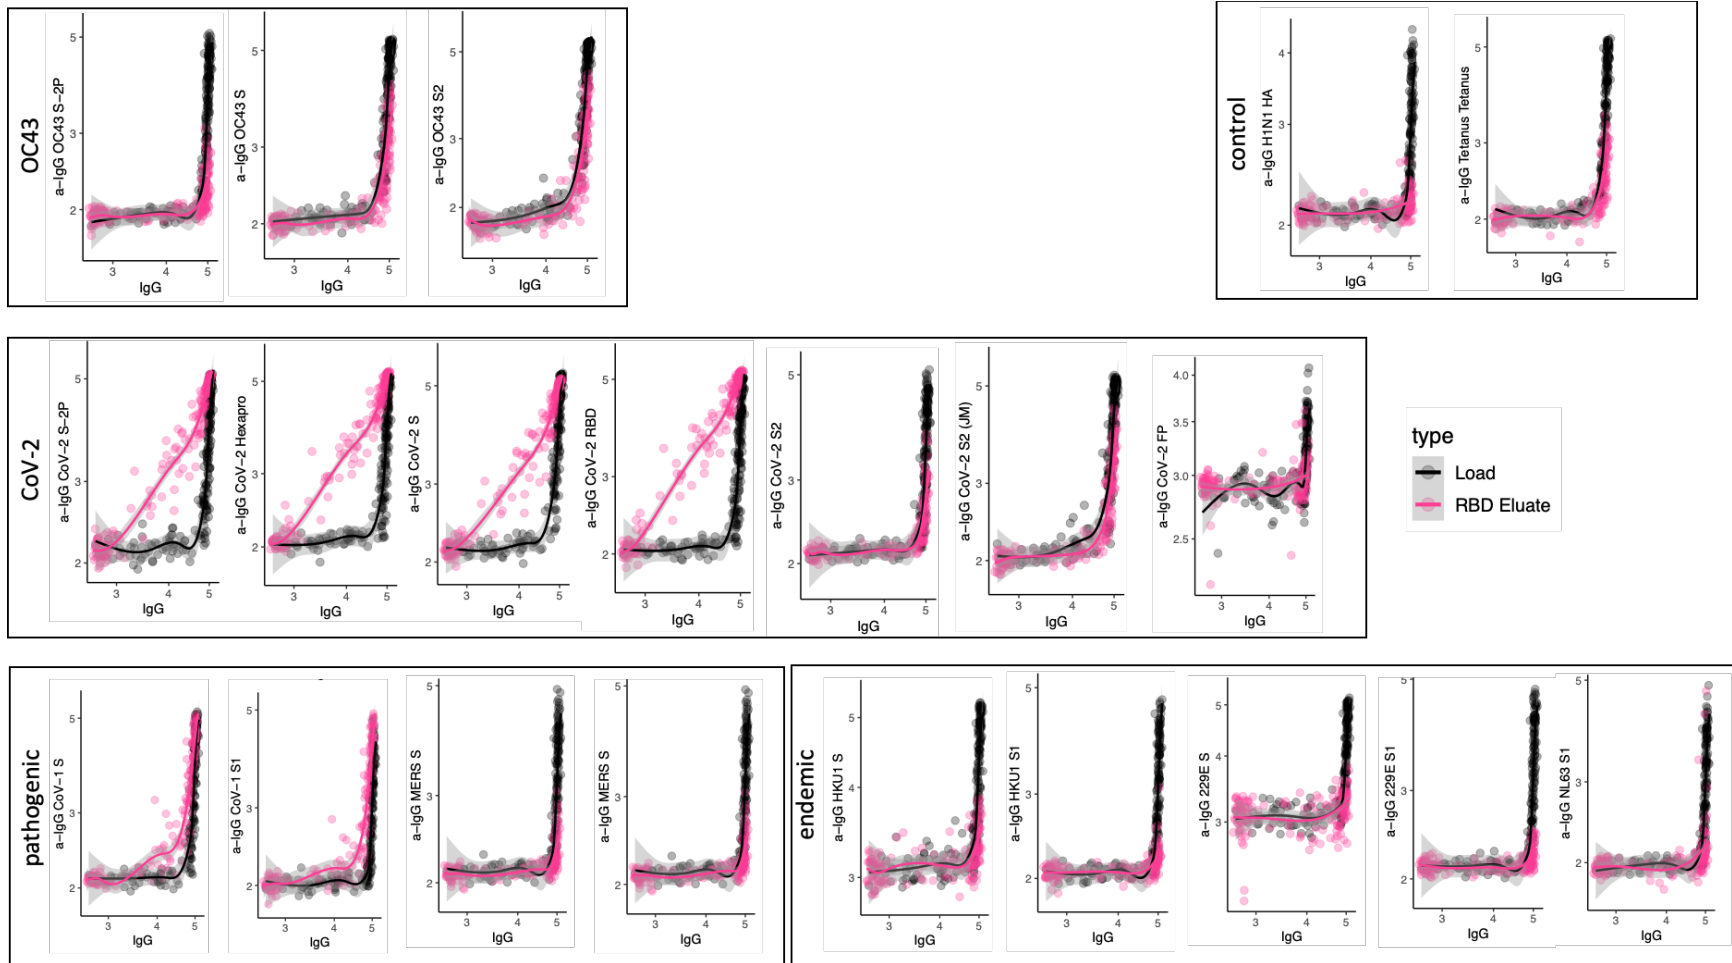

**Supplemental Figure 8: Cross-reactivity of SARS-CoV-2 RBD specific IgG.** Antigen binding profiles of IgG in unfractionated serum (load, black) and affinity-purified CoV-2 RBD- (eluate, pink) fractions from 30 SARS-CoV-2 convalescent subjects across OC43, control, CoV-2, pathogenic CoV, and other endemic CoV. Y-axis depicts binding signal for indicated antigen specificity, x-axis depicts signal from total IgG quantitation.

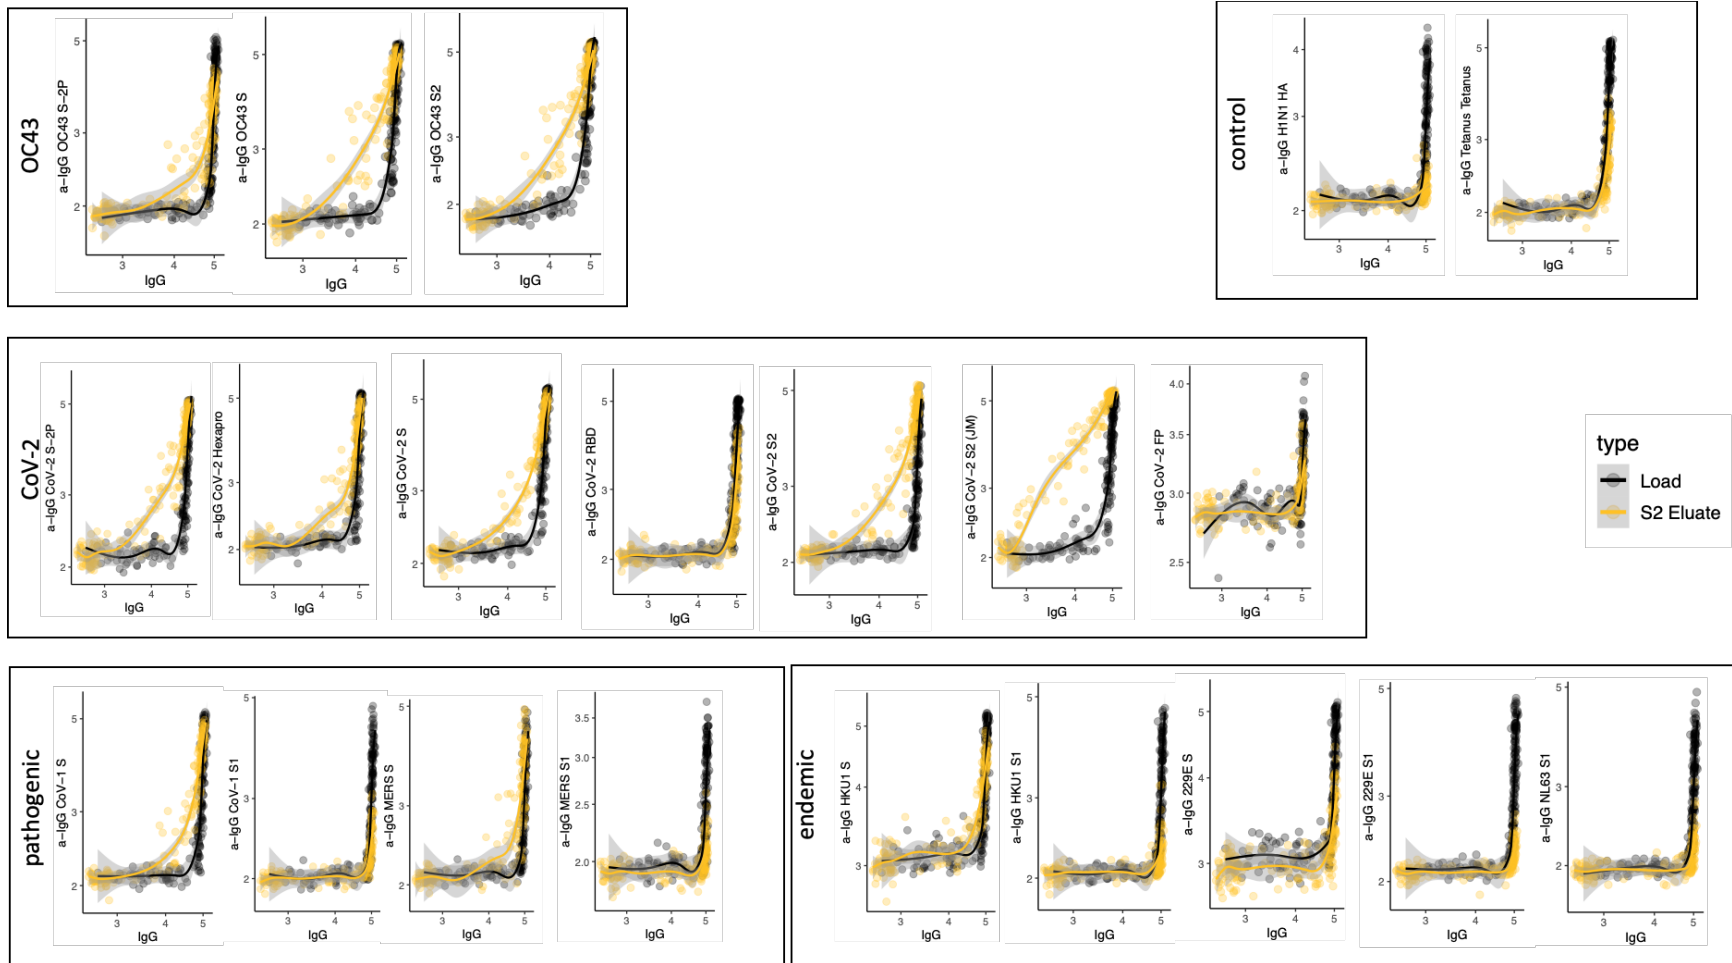

**Supplemental Figure 9: Cross-reactivity of SARS-CoV-2 S2 specific IgG.** Antigen binding profiles of IgG in unfractionated serum (load, black) and affinity-purified CoV-2 S2- (eluate, yellow) fractions from 30 SARS-CoV-2 convalescent subjects across OC43, control, CoV-2, pathogenic CoV, and other endemic CoV. Y-axis depicts binding signal for indicated antigen specificity, x-axis depicts signal from total IgG quantitation.

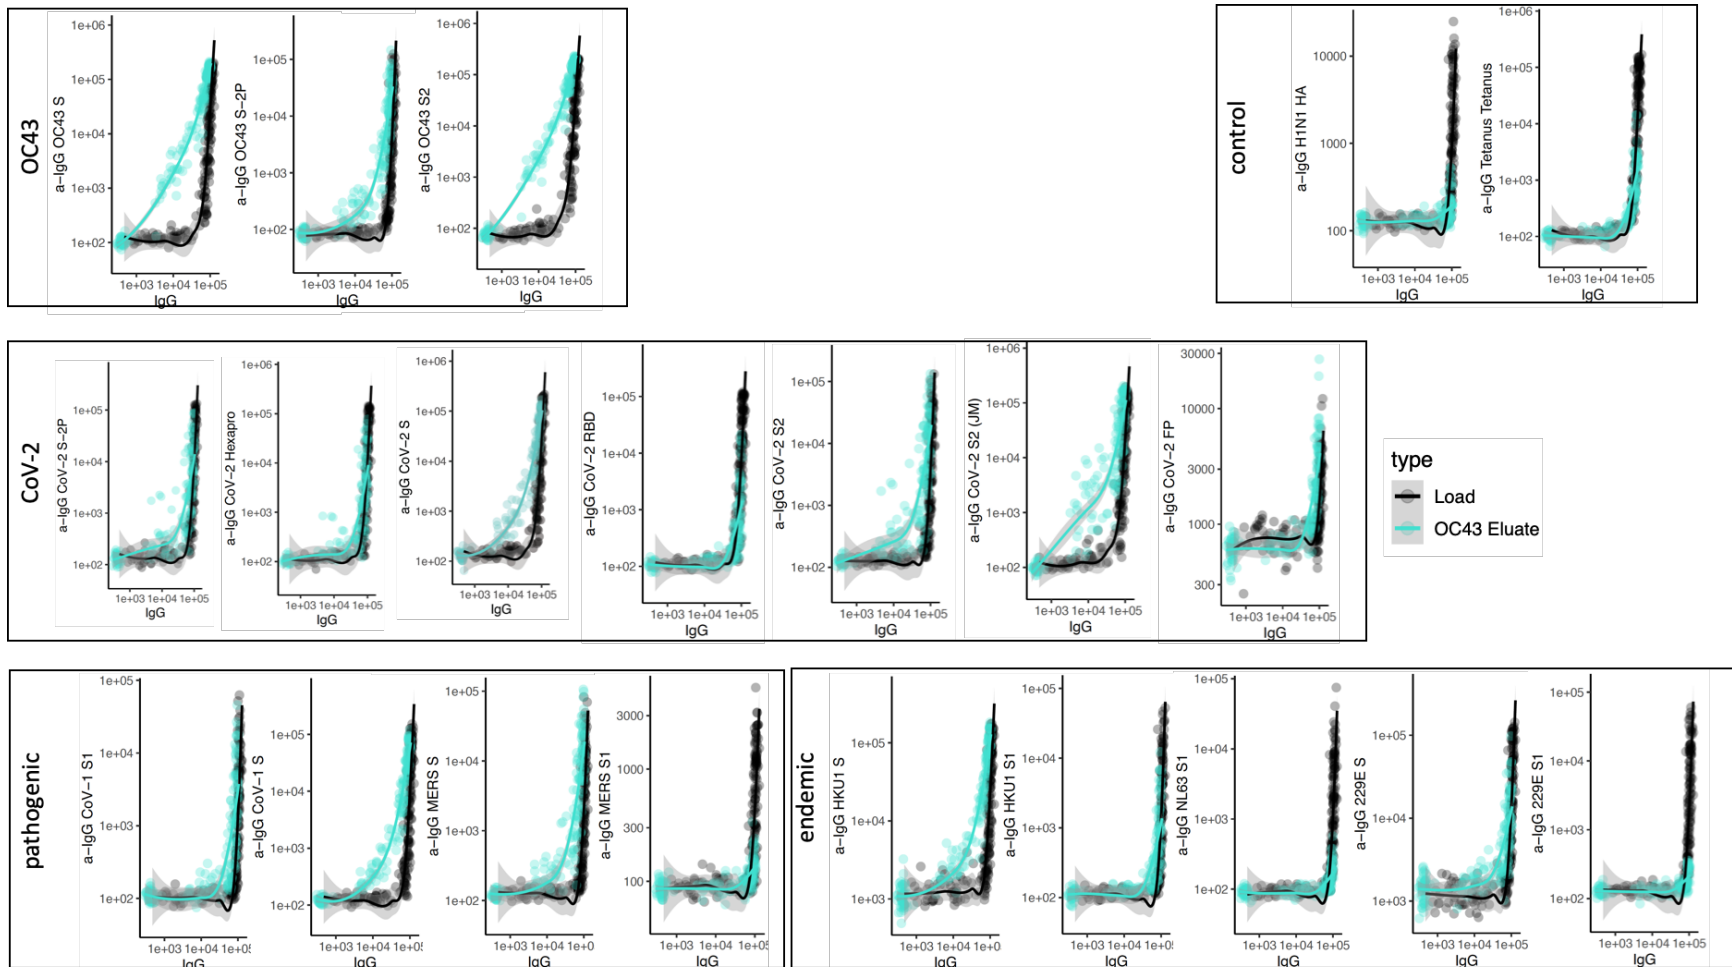

**Supplemental Figure 10: Cross-reactivity of OC43 S specific IgG.** Antigen binding profiles of IgG in unfractionated serum (load, black) and affinity-purified OC43 S- (eluate teal) fractions from 30 SARS-CoV-2 convalescent subjects across OC43, control, CoV-2, pathogenic CoV, and other endemic CoV. Y-axis depicts binding signal for indicated antigen specificity, x-axis depicts signal from total IgG quantitation.

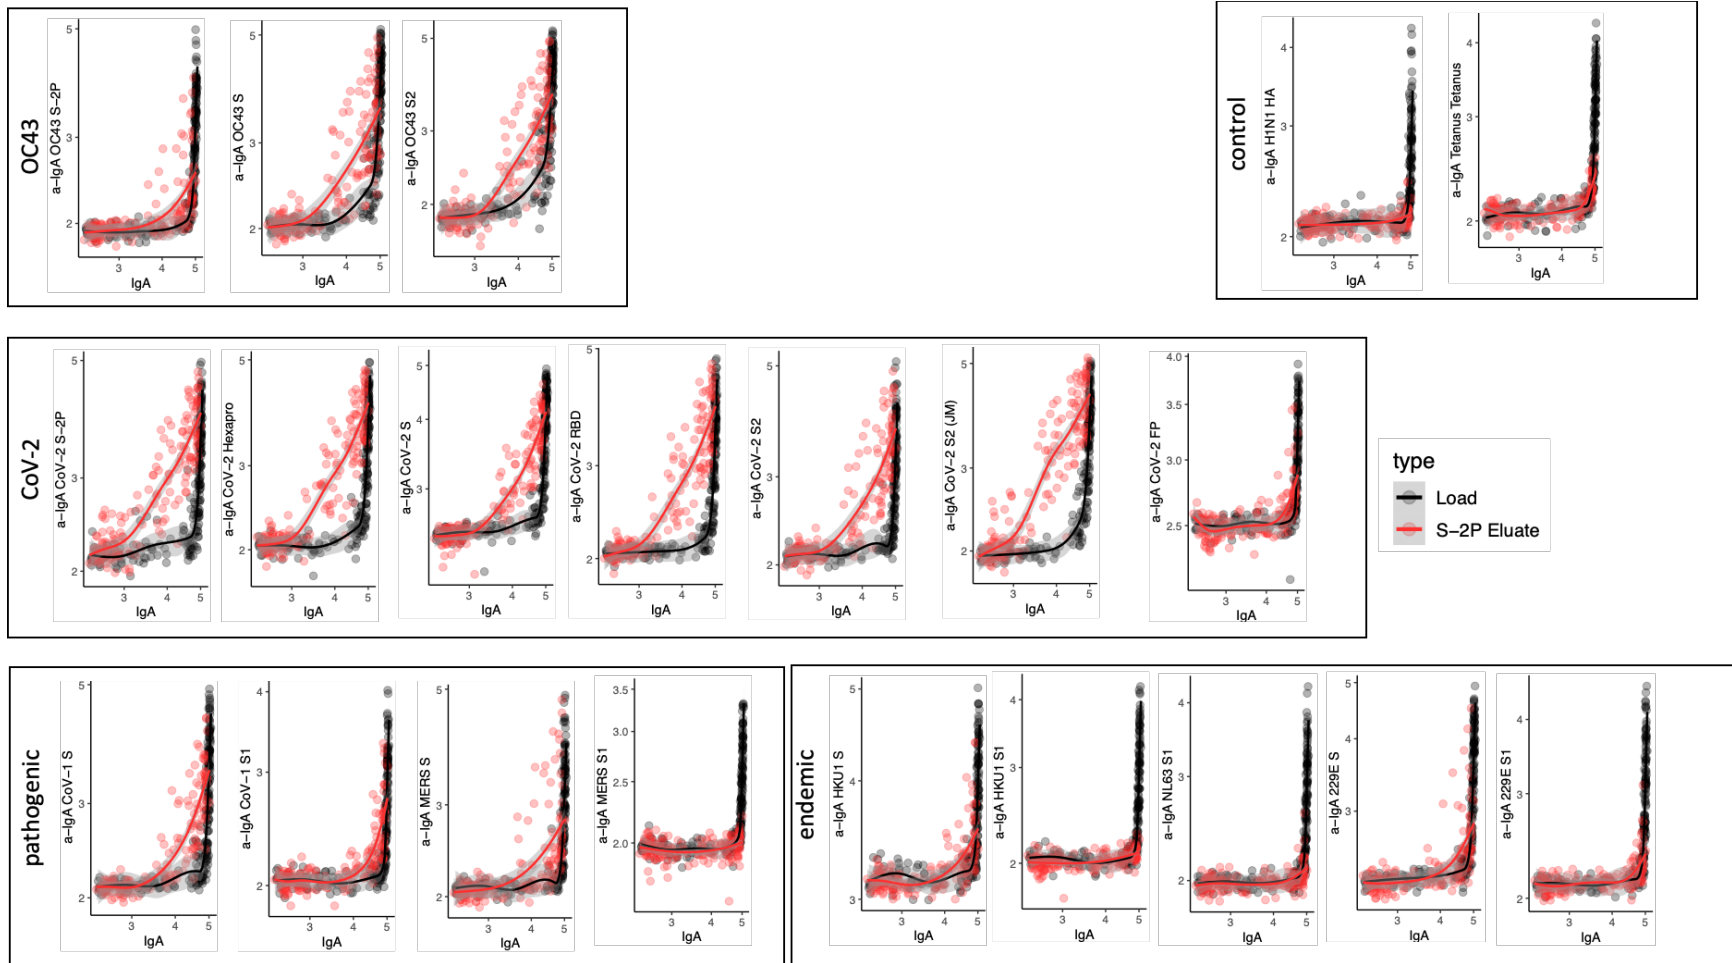

**Supplemental Figure 11: Cross-reactivity of SARS-CoV-2 S-2P specific IgA.** Antigen binding profiles of IgA in unfractionated serum (load, black) and affinity-purified CoV-2 S-2P- (eluate, red) fractions from 30 SARS-CoV-2 convalescent subjects across OC43, control, CoV-2, pathogenic CoV, and other endemic CoV. Y-axis depicts binding signal for indicated antigen specificity, x-axis depicts signal from total IgA quantitation.

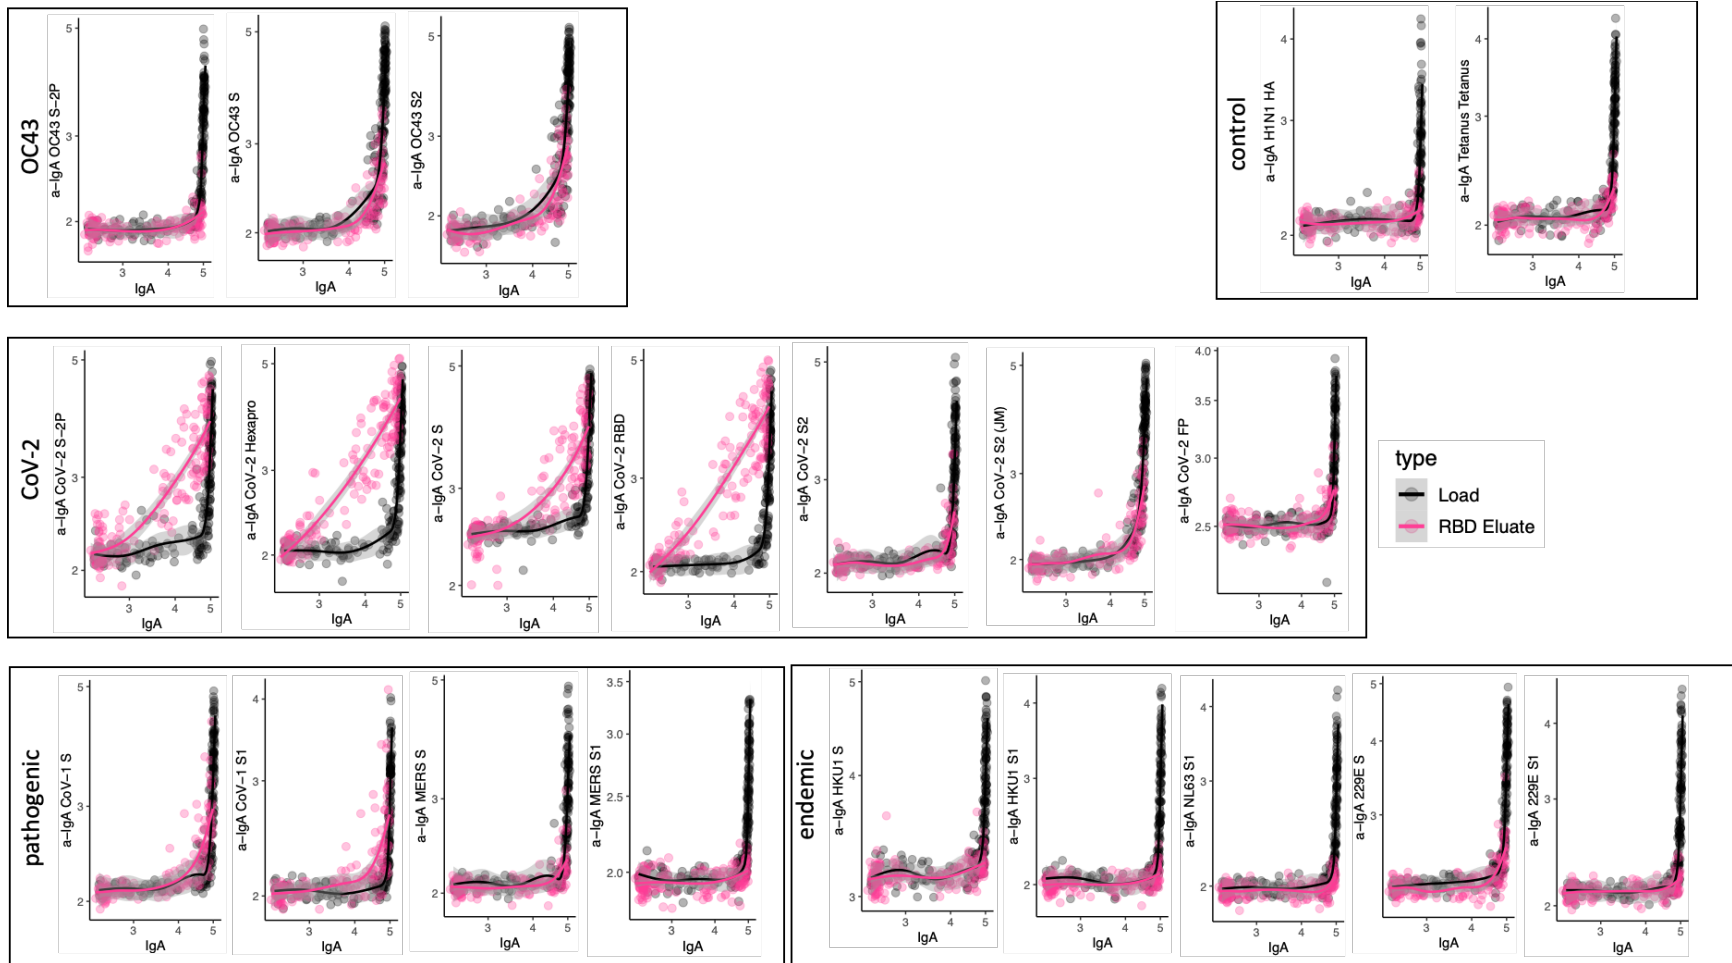

**Supplemental Figure 12: Cross-reactivity of SARS-CoV-2 RBD specific IgA.** Antigen binding profiles of IgA in unfractionated serum (load, black) and affinity-purified CoV-2 RBD- (eluate, pink) fractions from 30 SARS-CoV-2 convalescent subjects across OC43, control, CoV-2, pathogenic CoV, and other endemic CoV. Y-axis depicts binding signal for indicated antigen specificity, x-axis depicts signal from total IgA quantitation.

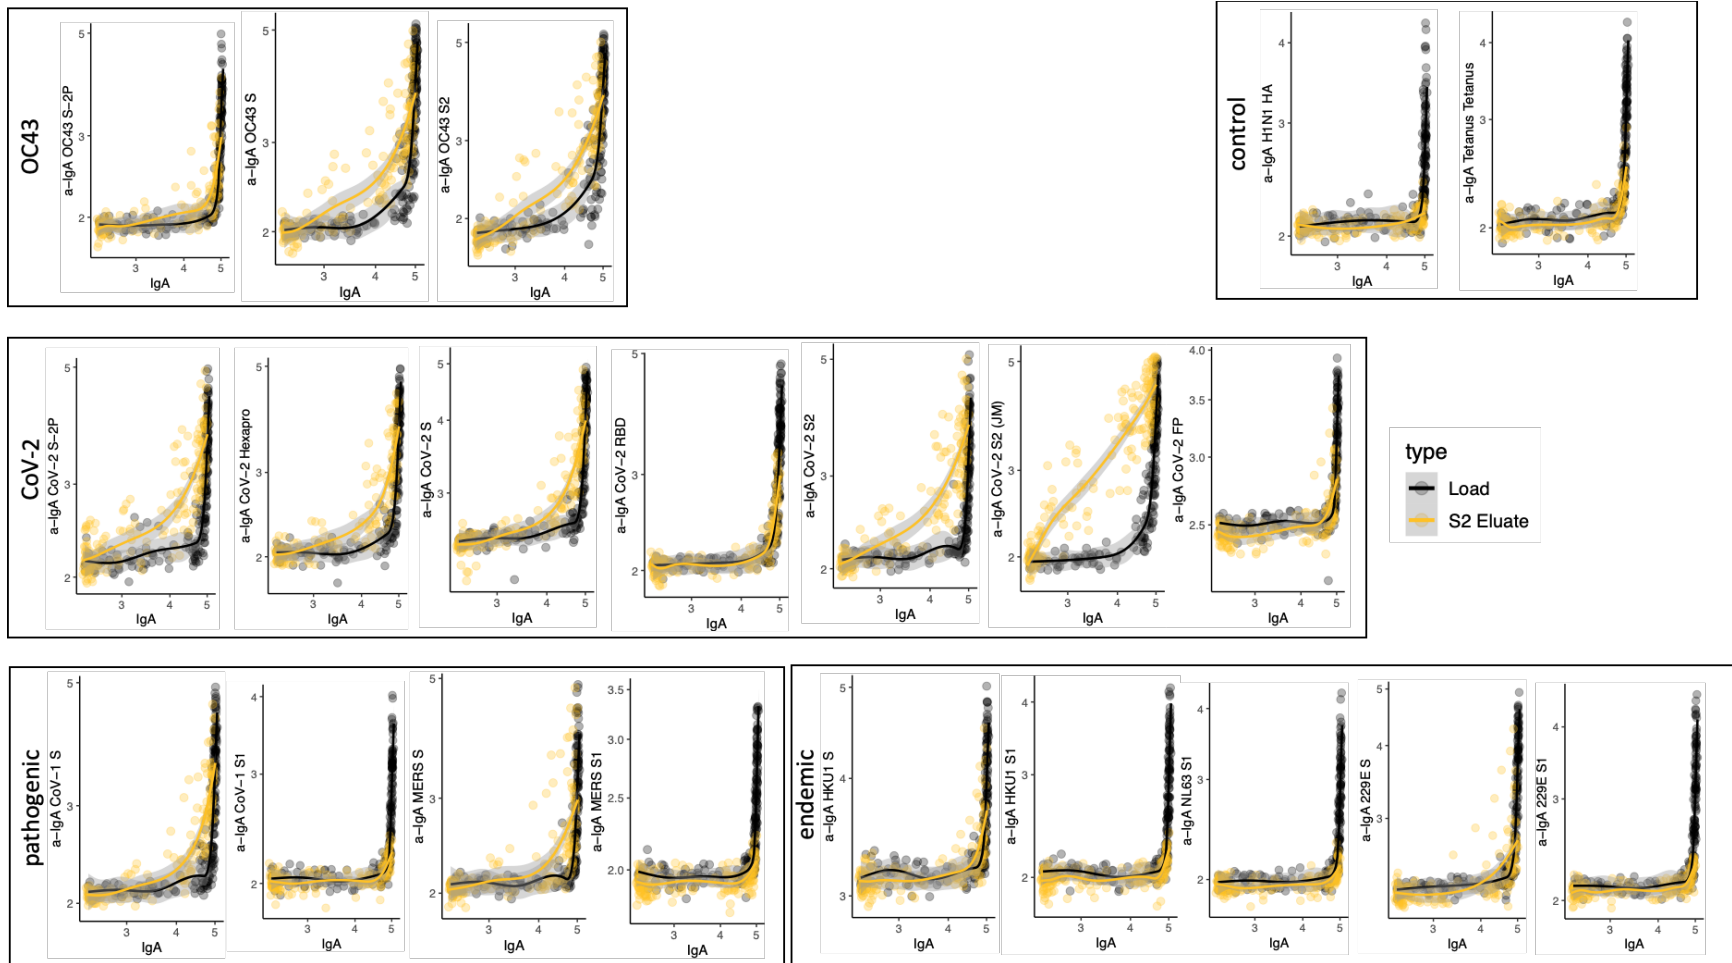

**Supplemental Figure 13: Cross-reactivity of SARS-CoV-2 S2 specific IgA.** Antigen binding profiles of IgA in unfractionated serum (load, black) and affinity-purified CoV-2 S2- (eluate, yellow) fractions from 30 SARS-CoV-2 convalescent subjects across OC43, control, CoV-2, pathogenic CoV, and other endemic CoV. Y-axis depicts binding signal for indicated antigen specificity, x-axis depicts signal from total IgA quantitation.

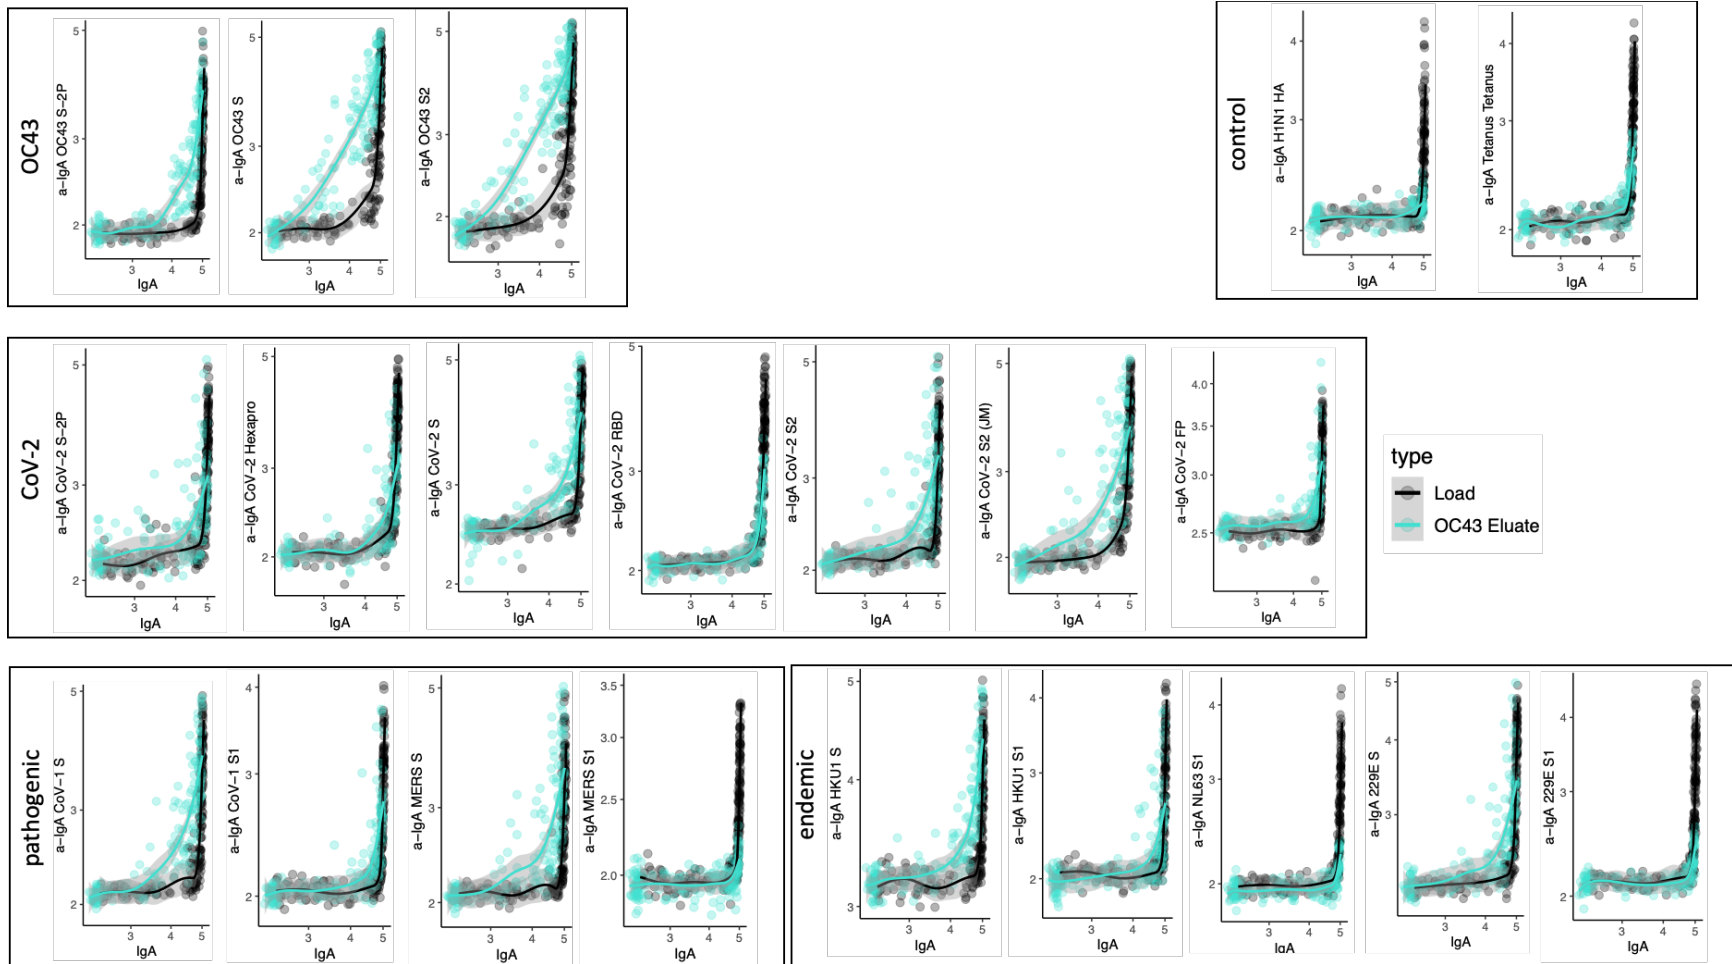

**Supplemental Figure 14: Cross-reactivity of OC43 S specific IgA.** Antigen binding profiles of IgA in unfractionated serum (load, black) and affinity-purified OC43 S- (eluate teal) fractions from 30 SARS-CoV-2 convalescent subjects across OC43, control, CoV-2, pathogenic CoV, and other endemic CoV. Y-axis depicts binding signal for indicated antigen specificity, x-axis depicts signal from total IgA quantitation.

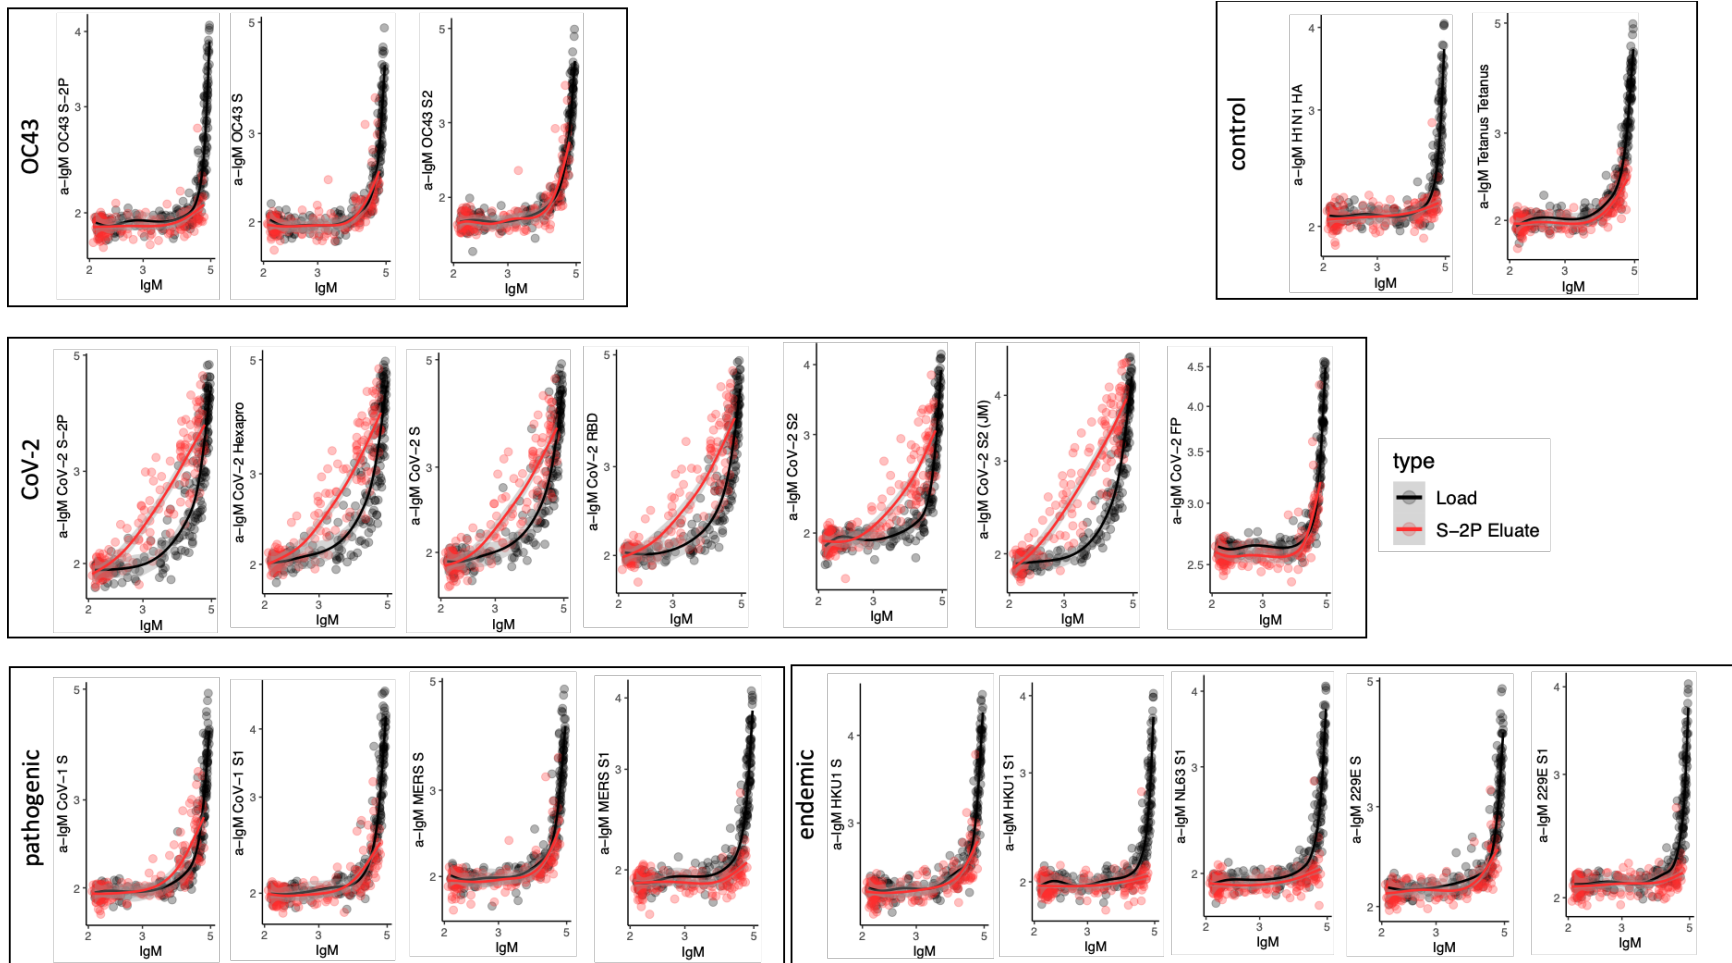

**Supplemental Figure 15: Cross-reactivity of SARS-CoV-2 S-2P specific IgM.** Antigen binding profiles of IgM in unfractionated serum (load, black) and affinity-purified CoV-2 S-2P- (eluate, red) fractions from 30 SARS-CoV-2 convalescent subjects across OC43, control, CoV-2, pathogenic CoV, and other endemic CoV. Y-axis depicts binding signal for indicated antigen specificity, x-axis depicts signal from total IgM quantitation.



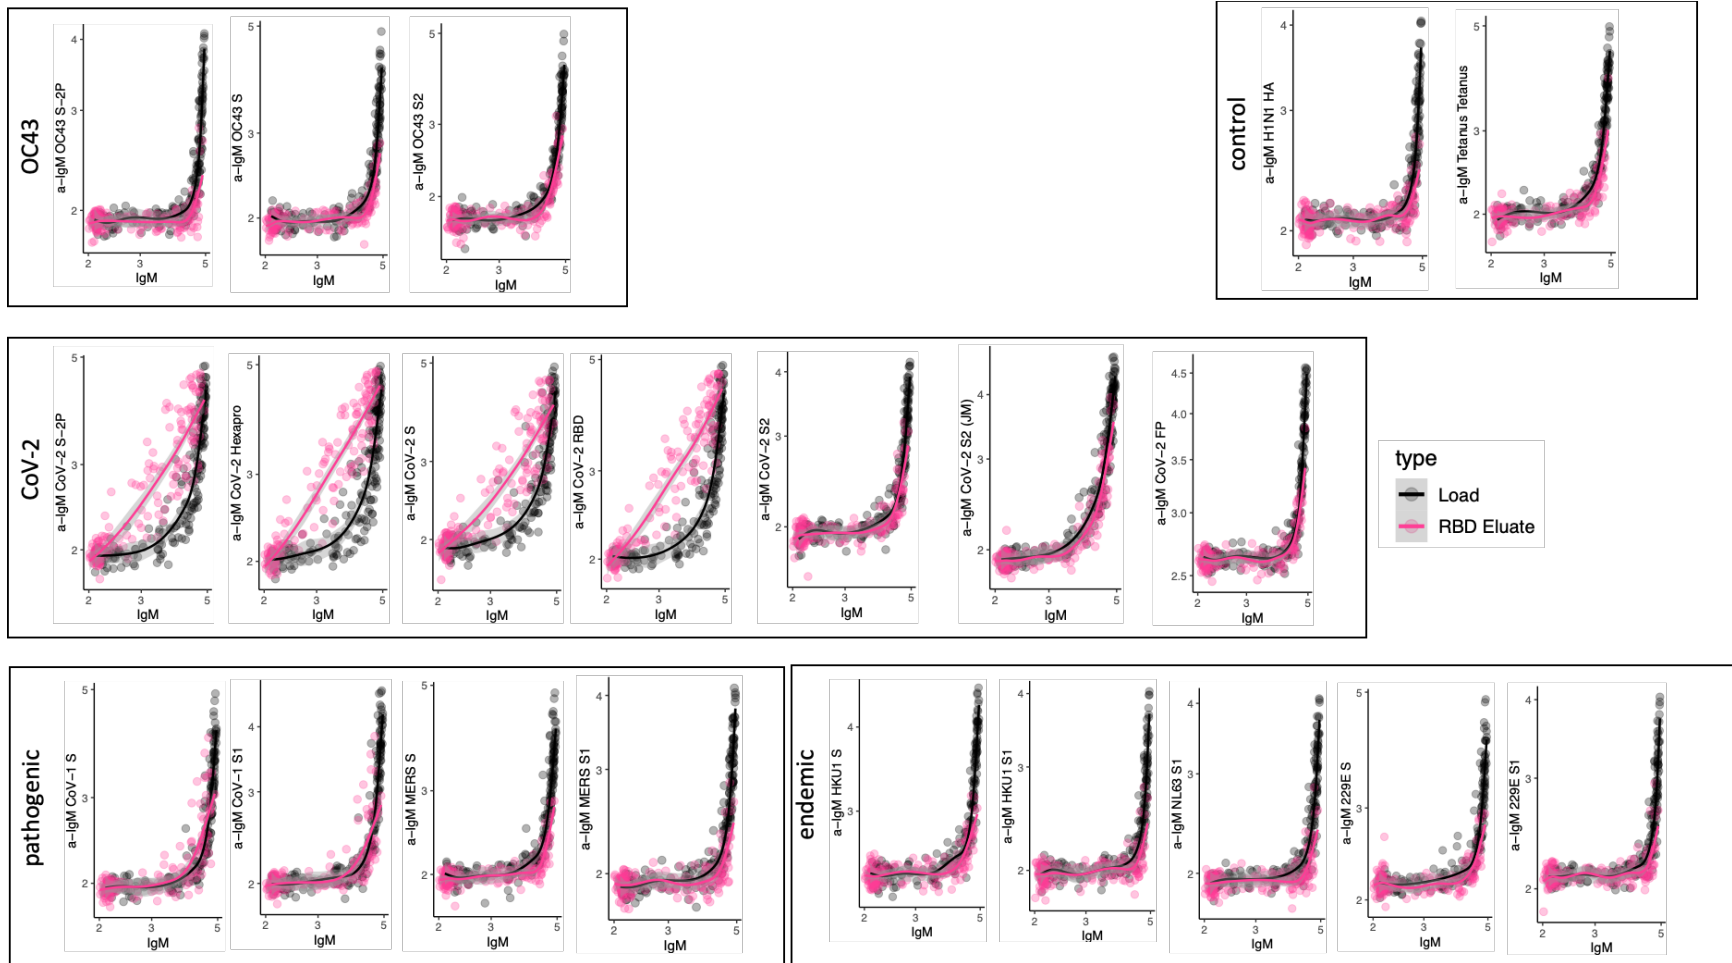

**Supplemental Figure 16: Cross-reactivity of SARS-CoV-2 RBD specific IgM.** Antigen binding profiles of IgM in unfractionated serum (load, black) and affinity-purified CoV-2 RBD- (eluate, pink) fractions from 30 SARS-CoV-2 convalescent subjects across OC43, control, CoV-2, pathogenic CoV, and other endemic CoV. Y-axis depicts binding signal for indicated antigen specificity, x-axis depicts signal from total IgM quantitation.

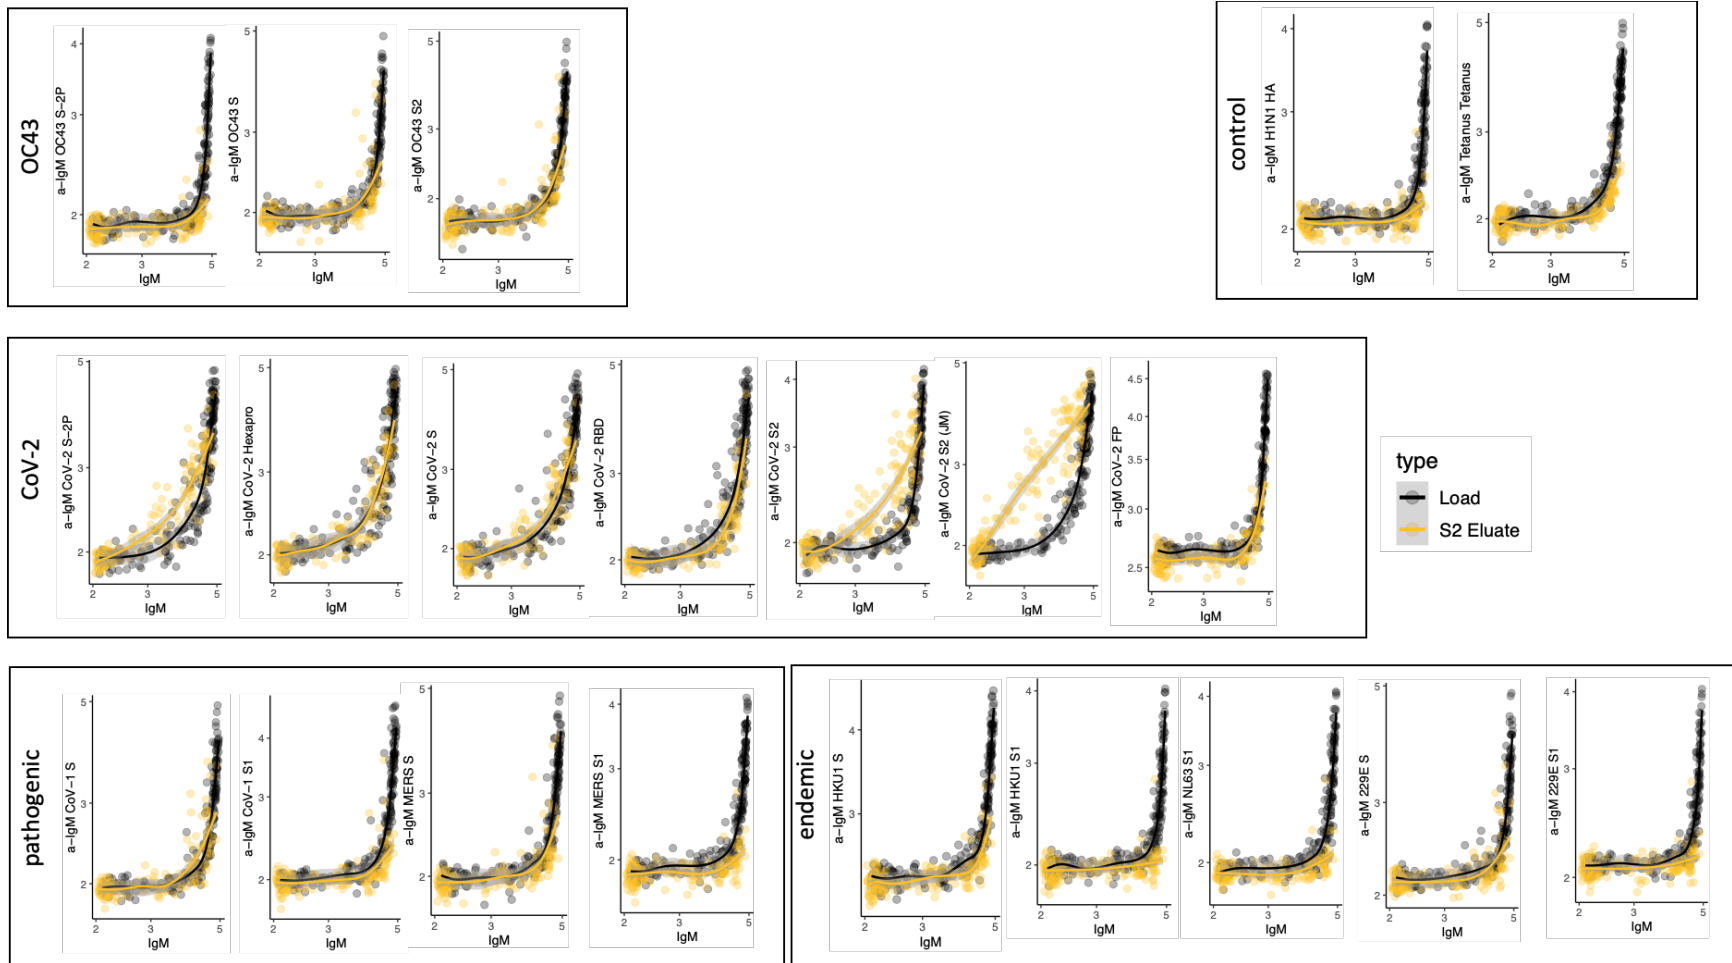

**Supplemental Figure 17: Cross-reactivity of SARS-CoV-2 S2 specific IgM.** Antigen binding profiles of IgM in unfractionated serum (load, black) and affinity-purified CoV-2 S2- (eluate, yellow) fractions from 30 SARS-CoV-2 convalescent subjects across OC43, control, CoV-2, pathogenic CoV, and other endemic CoV. Y-axis depicts binding signal for indicated antigen specificity, x-axis depicts signal from total IgM quantitation.

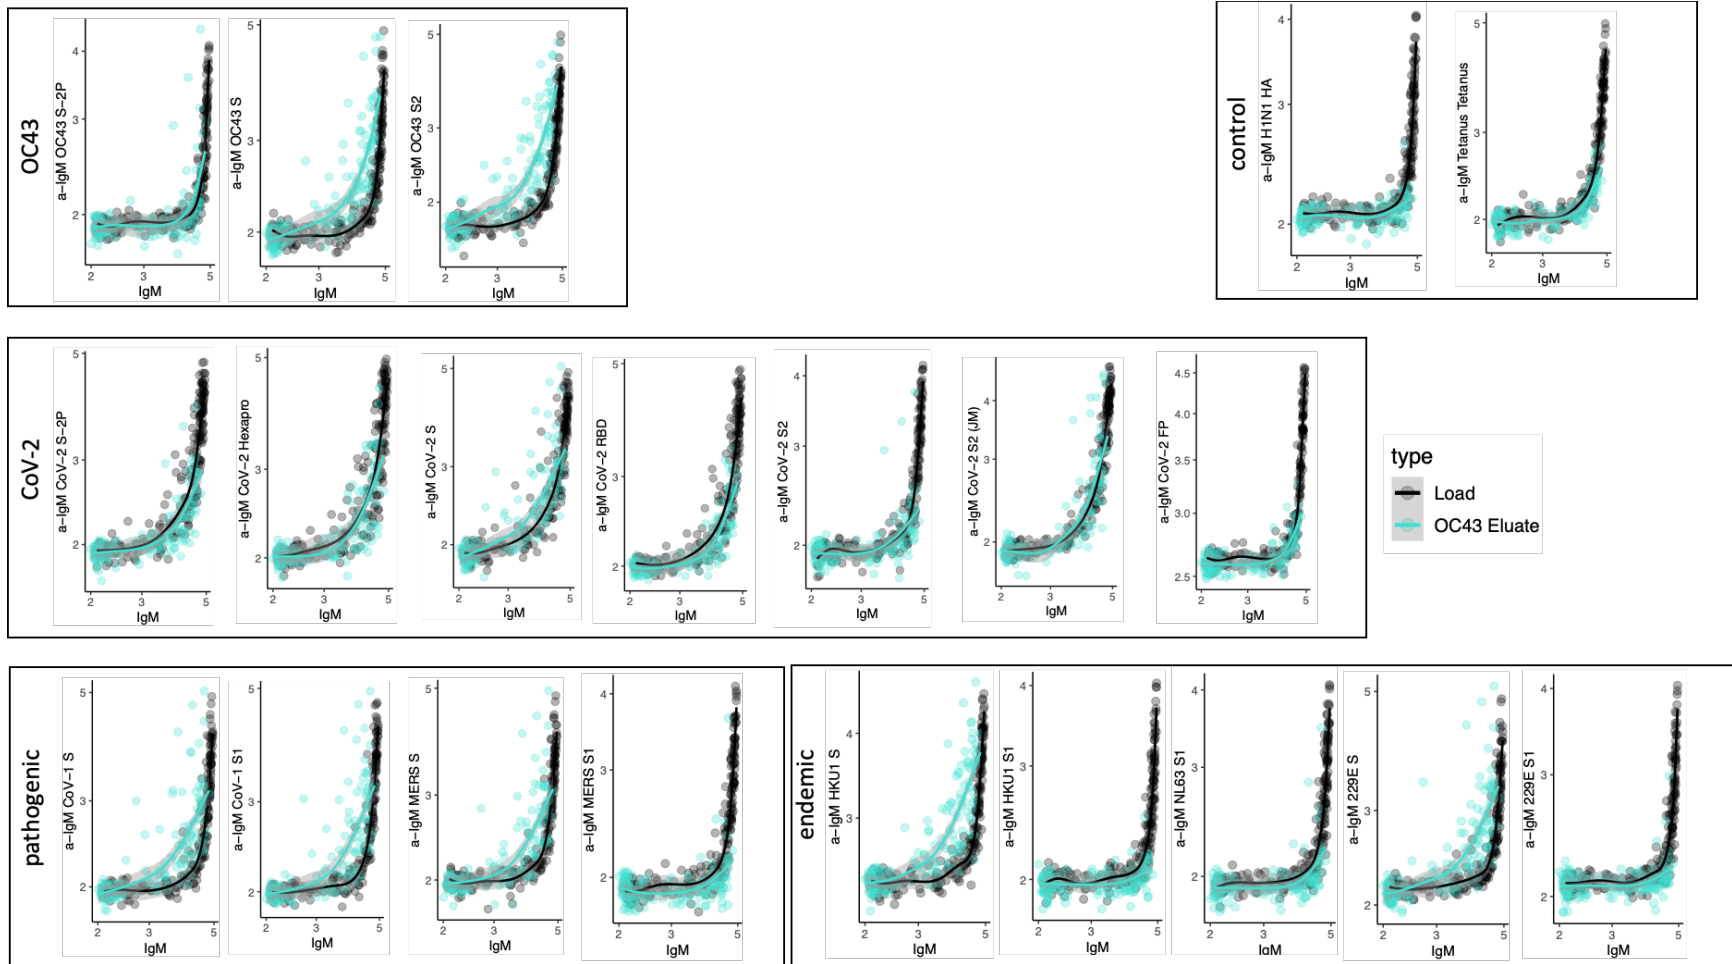

**Supplemental Figure 18: Cross-reactivity of OC43 S specific IgM.** Antigen binding profiles of IgM in unfractionated serum (load, black) and affinity-purified OC43 S- (eluate teal) fractions from 30 SARS-CoV-2 convalescent subjects across OC43, control, CoV-2, pathogenic CoV, and other endemic CoV. Y-axis depicts binding signal for indicated antigen specificity, x-axis depicts signal from total IgM quantitation.

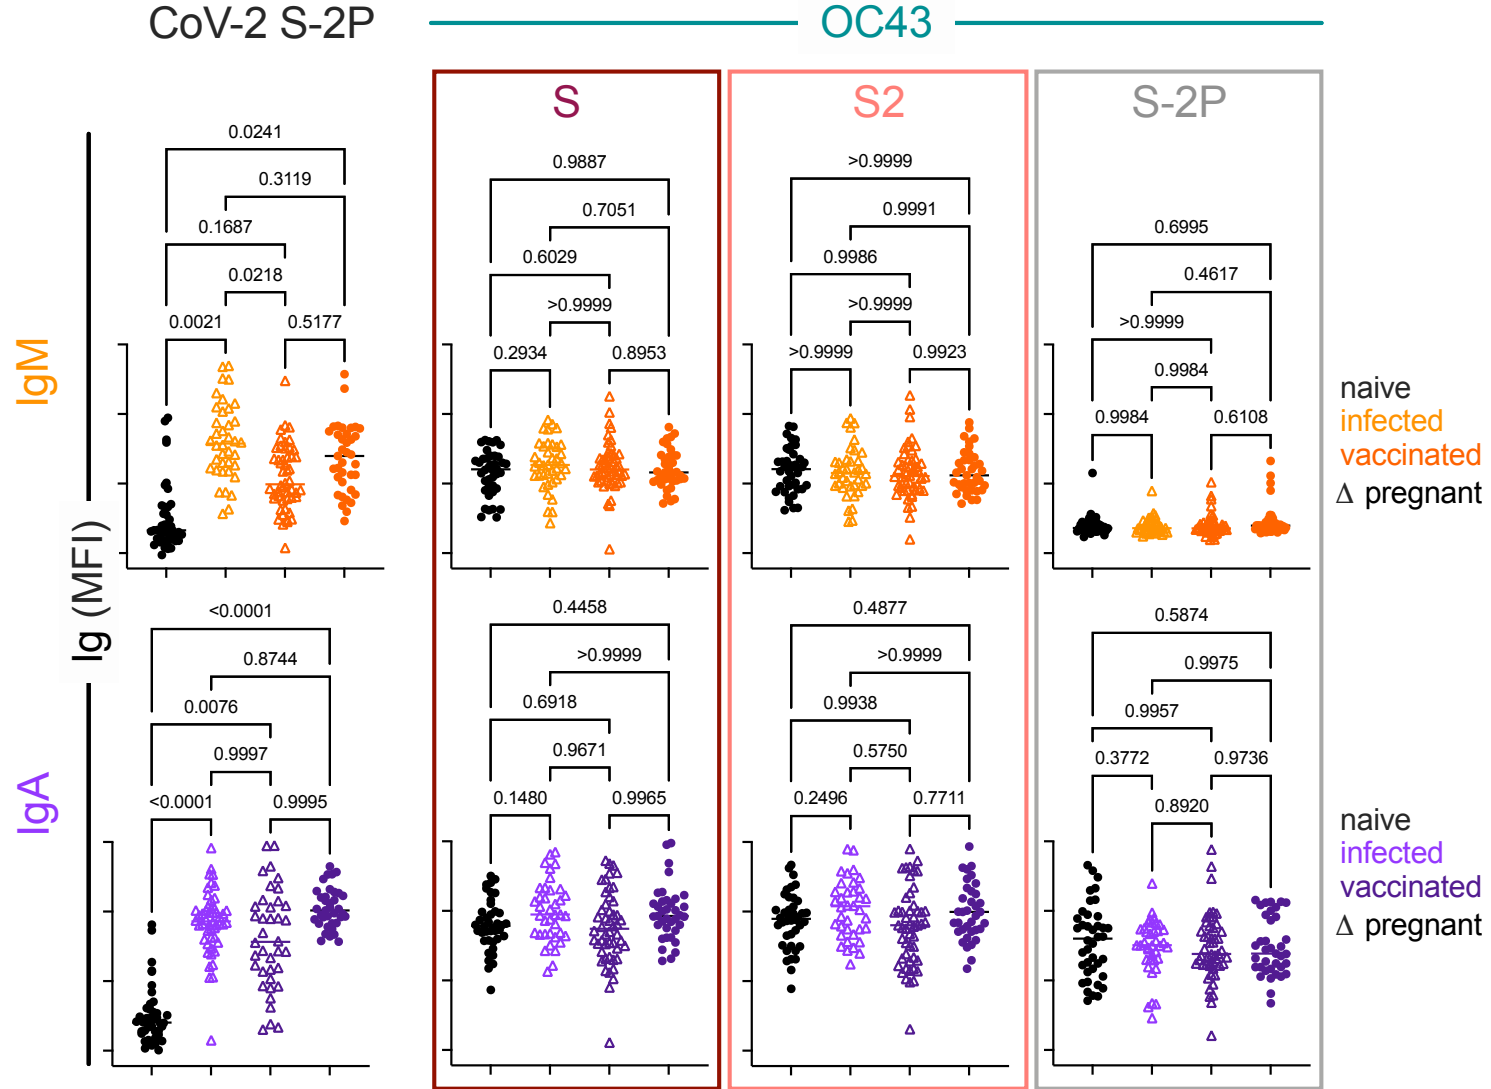

**Supplemental Figure 19. IgA and IgM responses among naïve subjects, infected pregnant women, vaccinated adults, and vaccinated pregnant women. Box plots of IgM (top) and IgA (bottom) responses to SARS CoV-2 S-2P (left) and OC43 (right) S, S2, and S-2P. Statistical significance by ANOVA with Dunnett's correction.**

**Supplemental Table 1.** Coronavirus structures. Spike protein information used to construct structural visualizations. PDB: Protein Data Bank; EM: electron microscopy.

|                      | PDB  | Type | Resolution (Å) | Format |
|----------------------|------|------|----------------|--------|
| SARS-CoV-2           | 6XKL | EM   | 3.21           | Trimer |
| 229E                 | 6U7H | EM   | 3.1            | Trimer |
| OC43                 | 6OHW | EM   | 2.9            | Trimer |
| NL63                 | 5SZS | EM   | 3.4            | Trimer |
| HKU1                 | 5I08 | EM   | 4.04           | Trimer |
| SARS-CoV-2<br>Closed | 6X6P | EM   | 3.22           | Trimer |

**Supplemental Table 2.** Fc detection and antigen reagents

| <b>Antigen</b>      | <b>Source</b>                   |
|---------------------|---------------------------------|
| H1N1 HA1            | Immune Technology IT-003-00110p |
| HSV gE              | Immune Technology IT-005-005p   |
| Tetanus             | Sigma 676570-37-9               |
| SARS CoV-2 N        | Immune Technology IT-002-033Ep  |
| SARS CoV-2 FP       | New England Peptide             |
| SARS CoV-2 S1       | ACRO Biosystems S1N-C52H3-100ug |
| SARS CoV-2 RBD      | BEI Resources NR-52366          |
| SARS CoV-2 S2       | Immune Technology IT-002-034p   |
| SARS CoV-2 S-2P     | Expressed in Expi 293           |
| SARS-CoV-2 S-6P     | Expressed in Expi 293           |
| WIV1 S-2P           | Expressed in Expi 293           |
| SARS-CoV-1 S        | Sino Biological 40634-V08B      |
| SARS CoV-1 S1       | Sino Biological 40150-V08B1     |
| MERS S              | Sino Biological                 |
| MERS S1             | Sino Biological 40069-V08B1     |
| OC43 S              | Sino Biological 40607-V08B      |
| OC43 S-2P           | Expressed in HEK 293F           |
| OC43 S2             | Sino Biological 40069-V08B      |
| 229E S1             | Sino Biological 40605-V08H      |
| 229E S              | Sino Biological 40601-V08H      |
| HKU1 S              | Sino Biological 40606-V08H      |
| HKU1 S1             | Sino Biological 40606-V08H      |
| NL63 S1             | Sino Biological 40604-V08H      |
| NL63 S              | Sino Biological 40606-V08B      |
| <b>Fc Detection</b> | <b>Source</b>                   |
| a- IgG              | Southern Biotech 1030-09        |
| a-IgG1              | Southern Biotech 9054-09        |
| a-IgG2              | Southern Biotech 9070-09        |
| a-IgG3              | Southern Biotech 9210-09        |
| a-IgG4              | Southern Biotech 9200-09        |
| a-IgA               | Southern Biotech 2050-09        |
| a-IgA1              | Southern Biotech 9130-09        |
| a-IgA2              | Southern Biotech 9140-09        |
| a-IgM               | Southern Biotech 9020-09        |
